# Supplementary material for: Genome-Wide Identification, Classification, and Expression Divergence of Glutathione-Transferase Family in Brassica rapa under Multiple Hormone Treatments
Source: Biomed Res Int. 2018 May 24;2018:6023457. doi: 10.1155/2018/6023457 (PMC5994329; doi:10.1155/2018/6023457)
Supplement: Supplementary Materials — Table 1: Sequences of the BraGST gene primers used for quantitative real-time PCR. Table 2: The basic description of BraGST genes in Brassica rapa. Table 3: Identification of BraGST syntenic genes between A. thaliana along with three subgenomes of B. rapa. Table 4: The FPKM values of BraGST genes. Table 5: Syntenic paralog pairs of BraGSTs with PC and FPKM values. Table 6: Cis-elements of BraGST genes in Brassica rapa. Table 7: Relative expression pattern of BraGST genes along with PC values with respect to hormonal stresses by qRT-PCR. Table 8: Pearson correlation coefficient of the stress-induced BraGSTs whose PC is greater than 0.5. Figure S1: Genetic distance among different subclasses of BraGSTs. Figure S2: Genetic distance among different subclasses of BraGSTs. Figure S3: Relative shares of different family among three subgenomes of B. rapa. Figure S4: Evolutionary tree of BraGSTs and the different subclasses being displayed with random color and tree generated with MEGA 7 using 1000-bootstrap replicate values. [file 6023457.f1.zip › Supplementary Tables (1-8) BraGSTs Nadeem Khan.xlsx]

## Sheet: Table 1
			Table.1	Sequences of the BraGST gene primers used for quantitative real-time PCR
				Genes	Sense Primer (5'->3')	Anti-Sense Primer (5'->3')
				BraGSTF16	TAAGCCTCTCTACGGTCTA	TTTCCAAGCCTCTCTACTC
				BraGSTF2	GGACAAAGGAAACCAACTT	GCCTAACTTAACCTCTTCTTC
				BraGSTF13	CCGAGCCATATCACTATACA	GTTACCAGCCAAGAACCT
				BraGSTF22	TGAAGCATACGCATTAGC	CAACTTTATAGTCCGCCTTT
				BraGSTF4	GCCATTACTCAGTACATAGC	TAGCCTCGTAGACATCAAG
				BraGSTF5	GTCCTCCTCACTCTACAC	GATTGGTTCCTTGGTCTTC
				BraGSTF6	CTATGGCTTGACCACAGA	AGTATTGAACCGCAGGAA
				BraGSTF7	CTGACTCCAAGAACATAGC	AGCCTCGTAGACATCAAG
				BraGSTF19	CCTGCTTATCTCGCCTTA	CTTCTCTTCGCTCTCCTT
				BraGSTF20	TTGAATCACGAGCCATATC	CATATACATCCAGGACCTTATC
				BraGSTU6	CTATGTGACGGCGATGAA	GACTCCAACGACCTCTTC
				BraGSTU3	CTACCACAAGATCCTTACGA	CATAGTTCCTGCGACCAT
				BraGSTU4	TTAGCCGAGTCACTTCTG	TCAATCGCAACATCTATTCC
				BraGSTU5	GAGGATGTGTTGCTTATAGG	TTGCCGTATGGATCTTGA
				BraGSTU2	GGCAAGAGCAGATGAGAA	TTCCAGTCCAATTCCTTCC
				BraGSTU8	GGCATACCATACGAATACTTG	TTCCAGTGACTTCCTTCTC
				BraGSTU11	ATGGCAGAGGAGGTGATA	GAAGGAAGGAGTGGGTTT
				BraGSTU23	CGGTTCTCATCCACAATG	GGTCTCTAGCGTCTTCAG
				BraGSTU12	AGAAGGAGTTCGTAGAGATG	GAAGAGACTTAGCCACACT
				BraGSTU14	AGAGGAGAAGAACATCAAGT	AAGGATCAGAAGGAAGGAAT
				BraGSTU13	TTCTCATCCACAACGGTAA	CCTTCTTGCCTGTCTCTT
				BraGSTU20	AACCAGTCTGTGAATCCAT	AAGTTATCTCCTCCGAAGTAG
				BraGSTU21	CCATCATCCAGGTTCAGTA	CTCGGAGTCAAGGTTCTT
				BraGSTU34	CTCTCAATGTTGTCCAGTATG	CTGCTTGTTCCTCACCTT
				BraGSTU26	GGTGAGGAGCAAGAAGAA	ATCAGGCAAGGATGTAGC
				BraGSTU32	GTAGACATTGCCATGACTG	GACACCATACTCCTTCCTAA
				BraGSTU27	AGATAACGATGTGAGAATGG	ACAGTAGGCAAGTAAGGT
				BraGSTU28	AAGCCGATGTTCTGAAGT	GGATTGGAAGGGAGGATAG
				BraGSTU30	AACCAATCCGTGAATCTCT	CGATGAATCCGATGTTGTC
				BraGSTU33	CATAGAAGAAGCCGATGTTC	CAGAAGGGAGGATGGAAG
				Actin	CTCAGTCCAAAAGAGGTATTCT	GTAGAATGTGTGATGCCAGATC

## Sheet: Table 2
	Table. 2	The basic description of BraGST genes in Brassica rapa
Gene Name	Protein Identifier	Chromosome Location	Exon Number	CDS	Length (aa)	MW (KDA)	pI	Aliphatic index	GRAVY	Subcelluar Prediction
BraGSTF1	Bra030515	A08:20733494-20734307	3	633	210	23.6911	5.93	90.57	-0.262	mito: 9, chlo: 2, cyto: 1, plas: 1
BraGSTF2	Bra033358	A10:2731358-2732318	3	633	210	23.6491	6.06	91.05	-0.23	mito: 9, chlo: 2, cyto: 1, plas: 1
BraGSTF3	Bra018543	A02:15817718-15818542	3	642	213	24.2917	5.66	90.23	-0.284	mito: 11, chlo: 1, cyto: 1
BraGSTF4	Bra036259	A09:1004852-1005823	3	642	213	24.1017	6.67	93.38	-0.278	mito: 10, chlo: 2, cyto: 1
BraGSTF5	Bra036260	A09:1002412-1003239	3	642	213	24.3018	6.25	89.34	-0.382	mito: 10, chlo: 2, cyto: 1
BraGSTF6	Bra000876	A03:13665108-13666213	3	642	213	24.1588	6.36	93	-0.26	mito: 10, chlo: 1, nucl: 1, cyto: 1
BraGSTF7	Bra000875	A03:13661766-13662884	3	642	213	24.0007	6.76	90.7	-0.241	mito: 7, cyto: 3, chlo: 2, nucl: 1
BraGSTF8	Bra032578	A09:38461703-38463008	5	732	243	28.3907	9.01	88.6	-0.407	mito: 8.5, cyto_mito: 5, cyto: 2, chlo: 1, nucl: 1
BraGSTF9	Bra000460	A03:11233249-11234131	3	648	215	24.1672	5.99	91.21	-0.067	chlo: 10, cyto: 2, plas: 1
BraGSTF10	Bra004434	A05:103410-104177	3	603	200	22.6145	7.66	102.9	-0.099	cyto: 6.5, chlo: 6, cyto_E.R.: 4
BraGSTF11	Bra024517	A06:16976482-16977129	4	537	178	20.87	5.34	101.29	-0.221	cyto: 7.5, cyto_E.R.: 4.5, extr: 3, nucl: 2
BraGSTF12	Bra014394	A04:301125-301959	3	660	219	24.4993	6.11	93.93	-0.092	chlo: 9, mito: 3, cyto: 1
BraGSTF13	Bra033359	A10:2729433-2730724	4	747	248	29.0046	9.23	81.05	-0.352	chlo: 5, mito: 5, vacu: 2, E.R.: 2
BraGSTF14	Bra037204	A09:4967584-4969510	3	765	254	29.1335	5.16	85.59	-0.272	cyto: 7.5, cyto_E.R.: 4.5, nucl: 3, chlo: 1, mito: 1
BraGSTF15	Bra023602	A02:3117740-3118547	3	648	215	24.7358	5.79	98.42	-0.082	cyto: 6, chlo: 3, mito: 2, plas: 2
BraGSTF16	Bra033361	A10:2723384-2724674	4	564	187	21.9214	7.7	84.44	-0.349	chlo: 5, cyto: 4.5, cyto_E.R.: 3, mito: 2, nucl: 1
BraGSTF17	Bra008570	A10:11677671-11678470	3	642	213	24.5647	5.79	102.96	-0.083	cyto: 7, chlo: 4, plas: 2
BraGSTF18	Bra021673	A04:13901442-13902299	3	648	215	24.213	5.81	92.05	-0.111	mito: 5, chlo: 4, cyto: 4
BraGSTF19	Bra022815	A03:7230400-7231268	3	648	215	24.22	6.17	90.23	-0.153	chlo: 5, cyto: 4, mito: 4
BraGSTF20	Bra022816	A03:7232844-7233982	3	648	215	24.3631	5.14	97.95	-0.116	E.R.: 4, cyto: 2.5, cyto_nucl: 2.5, chlo: 2, nucl: 1.5, mito: 1, extr: 1, vacu: 1
BraGSTF21	Bra032010	A05:24811698-24812553	3	633	210	24.2202	5.38	97.48	-0.096	chlo: 11, mito: 2
BraGSTF22	Bra033360	A10:2725187-2726412	4	594	197	22.4741	9.73	90.61	-0.321	extr: 10, chlo: 1, cyto: 1, mito: 1
BraGSTU1	Bra000474	A03:11298534-11299292	2	675	224	25.718	6.04	98.35	-0.286	cyto: 8.5, cyto_E.R.: 5.5, E.R.: 1.5, chlo: 1, nucl: 1, cysk: 1
BraGSTU2	Bra018386	A05:7878103-7878905	2	675	224	25.9103	6.35	100.49	-0.272	cyto: 10, E.R.: 2, nucl: 1
BraGSTU3	Bra039984	A04:13320845-13321741	2	669	222	25.7995	6.17	96.98	-0.19	cyto: 9, extr: 2, chlo: 1, mito: 1
BraGSTU4	Bra039982	A04:13313417-13315076	2	675	224	25.7252	5.33	100.54	-0.048	cyto: 12, chlo: 1
BraGSTU5	Bra039983	A04:13318102-13319043	2	687	228	26.2517	5.43	101.27	-0.092	cyto: 5, nucl: 2, mito: 1, plas: 1, extr: 1, vacu: 1, E.R.: 1, pero: 1
BraGSTU6	Bra039980	A04:13307502-13308251	2	678	225	25.741	5.17	109.47	-0.037	chlo: 6, cyto: 3, nucl: 2, mito: 1, vacu: 1
BraGSTU7	Bra034061	A01:25173328-25175761	2	681	226	26.2083	5.29	86.68	-0.292	cyto: 10, chlo: 2, nucl: 1
BraGSTU8	Bra018385	A05:7870113-7870879	2	573	190	22.1287	9.03	82.11	-0.541	cyto: 8, extr: 3, chlo: 1, E.R.: 1
BraGSTU9	Bra027840	A09:9582766-9585655	2	705	234	26.2293	5.55	94.57	-0.17	cyto: 10, nucl: 2, chlo: 1
BraGSTU10	Bra008157	A02:12484722-12485496	2	699	232	26.8407	5.47	97.37	-0.373	cyto: 7, pero: 5, nucl: 1
BraGSTU11	Bra025995	A06:6300487-6301250	2	648	215	24.8937	5.42	86.65	-0.307	cyto: 11, nucl: 2
BraGSTU12	Bra026679	A09:34937549-34938289	2	660	219	25.2632	5.11	87.67	-0.325	cyto: 6, nucl: 3.5, cysk_nucl: 2.5, plas: 2, chlo: 1
BraGSTU13	Bra003644	A07:17493538-17494733	2	660	219	25.6157	6.36	77.44	-0.463	cyto: 9, nucl: 1.5, cysk_nucl: 1.5, chlo: 1, pero: 1
BraGSTU14	Bra026681	A09:34944947-34945689	2	660	219	25.2824	5.63	80.14	-0.333	cyto: 9, nucl: 2.5, cysk_nucl: 2, extr: 1
BraGSTU15	Bra016615	A08:18524347-18525245	2	660	219	25.6687	5.1	79.73	-0.337	cyto: 9, nucl: 3, chlo: 1
BraGSTU16	Bra024659	A09:24975356-24976214	2	684	227	25.0688	5.35	91.54	-0.04	chlo: 14
BraGSTU17	Bra026684	A09:34958068-34958810	2	660	219	25.2823	5.45	80.14	-0.331	cyto: 9, nucl: 2.5, cysk_nucl: 2, extr: 1
BraGSTU18	Bra026680	A09:34942557-34943294	2	660	219	25.033	5.63	83.7	-0.287	nucl: 6.5, cyto: 4, cysk_nucl: 4, plas: 2
BraGSTU19	Bra010088	A06:14326938-14327642	1	705	234	27.0223	5.57	101.5	-0.279	cyto: 7, cysk: 3, chlo: 2, nucl: 1
BraGSTU20	Bra003646	A07:17501133-17502067	2	657	218	25.2421	5.3	81.79	-0.354	cyto: 6, chlo: 2, golg: 2, nucl: 1.5, cysk_nucl: 1.5, plas: 1
BraGSTU21	Bra003647	A07:17502931-17504272	2	663	220	25.3583	6.35	91.73	-0.276	nucl: 11, cyto: 1, cysk: 1
BraGSTU22	Bra034977	Scaffold	2	684	227	26.7389	5.84	90.53	-0.374	cyto: 12, nucl: 1
BraGSTU23	Bra025994	A06:6302426-6303279	2	660	219	25.189	5.43	82.83	-0.38	cyto: 9, nucl: 2.5, cysk_nucl: 2, mito: 1
BraGSTU24	Bra015901	A07:23580140-23580913	2	699	232	27.1082	6.46	101.98	-0.373	cyto: 8, nucl: 2, pero: 2, extr: 1
BraGSTU25	Bra019940	A06:3595365-3596146	2	684	227	25.2432	6.14	87.31	-0.107	cyto: 7, chlo: 5, nucl: 1.5, cysk_nucl: 1.5
BraGSTU26	Bra035031	A07:25146665-25147483	2	663	220	25.6488	5.63	87.32	-0.318	cyto: 9.5, cyto_E.R.: 5.5, extr: 2, chlo: 1
BraGSTU27	Bra016253	A07:21920371-21921303	2	687	228	25.1497	4.9	85.96	-0.046	chlo: 13
BraGSTU28	Bra016252	A07:21922558-21923488	2	693	230	25.0675	5.6	87	-0.091	chlo: 12, mito: 2
BraGSTU29	Bra016250	A07:21928769-21929606	2	705	234	26.6597	5.23	91.62	-0.134	cyto: 10, cysk: 2, nucl: 1
BraGSTU30	Bra007890	A02:10623431-10624635	2	693	230	26.3063	5.32	91.09	-0.091	cyto: 7, cysk: 4, nucl: 2
BraGSTU31	Bra025993	A06:6304687-6305469	3	663	220	25.4982	5.17	83.32	-0.341	cyto: 13
BraGSTU32	Bra035029	A07:25141822-25142973	3	657	218	24.9256	5.15	84.13	-0.3	nucl: 5.5, cyto: 5, cysk_nucl: 3.5, chlo: 2
BraGSTU33	Bra007889	A02:10615092-10618877	3	627	208	22.4795	5.24	88.7	-0.033	chlo: 13
BraGSTU34	Bra003645	A07:17498418-17499341	2	615	204	23.2807	6.76	75.59	-0.359	cyto: 8, nucl: 2.5, chlo: 2, cysk_nucl: 2
BraGSTU35	Bra038140	A05:10266980-10267742	2	675	224	25.4429	5.33	79.2	-0.399	nucl: 6, cyto: 4, cysk: 2, chlo: 1
BraGSTU36	Bra003970	A07:19318276-19319095	2	705	234	26.6796	5.45	86.67	-0.186	cyto: 6, cysk: 6, golg: 2
BraGSTU37	Bra031708	A09:36887882-36888869	2	684	227	25.8948	5.61	94.14	-0.16	chlo: 9, extr: 2, nucl: 1, cyto: 1
BraGSTZ1	Bra024820	A06:22560581-22562522	10	642	213	23.6742	5.6	93.94	-0.163	mito: 7, chlo: 6
BraGSTZ2	Bra017417	A09:13995126-13996670	9	717	238	26.8448	6.23	88.15	-0.276	chlo: 5, cyto: 5, pero: 2, nucl: 1.5, cysk_nucl: 1.5
BraGSTZ3	Bra026601	A02:20150189-20152669	10	1212	403	44.5898	5.06	104.96	0.232	chlo: 4, E.R.: 3, nucl: 2, cyto: 2, plas: 2
BraGSTT1	Bra025512	A04:8589712-8591160	7	741	246	27.9055	9.44	94.35	-0.222	chlo: 4, nucl: 3, cyto: 2, mito: 1, plas: 1, pero: 1, cysk: 1
BraGSTT2	Bra028491	A07:14331041-14332426	7	726	241	27.3999	9.5	93.49	-0.245	chlo: 5, nucl: 2, cyto: 2, mito: 2, plas: 1, pero: 1
BraGSTL1	Bra028863	A02:320421-324893	9	1386	461	53.0277	5.07	87.98	-0.263	chlo: 7, cyto: 6
BraGSTL2	Bra007130	A09:28995507-28997077	9	891	296	33.4669	6.37	83.04	-0.392	chlo: 11, nucl: 1, extr: 1
BraGSTL3	Bra025530	A04:8465819-8466866	6	504	167	18.8544	9.41	66.65	-0.718	nucl: 6, cyto: 2, chlo: 1, mito: 1, plas: 1, extr: 1, pero: 1
BraDHAR1	Bra023579	A02:3003366-3004393	6	552	183	20.7357	5.63	80.93	-0.429	nucl: 5, cyto: 4, mito: 2, extr: 2
BraDHAR2	Bra025749	A06:7408511-7409337	3	642	213	23.548	5.76	90.61	-0.203	cyto: 9.5, cyto_E.R.: 5.5, nucl: 2, mito: 1
BraDHAR3	Bra008188	A02:12673972-12674831	3	645	214	23.6393	5.88	89.25	-0.214	cyto: 7, nucl: 3, chlo: 2, mito: 2
BraDHAR4	Bra016503	A08:18011642-18012574	3	633	210	23.195	6.83	96.05	-0.047	cyto: 13.5, cyto_E.R.: 7.5
BraEF1G1	Bra031676	A09:37044573-37046725	8	1242	413	46.4664	5.36	77.7	-0.306	cyto: 11, nucl: 2
BraEF1G2	Bra020005	A06:3323873-3326090	8	1242	413	46.3974	5.58	79.37	-0.266	cyto: 8, nucl: 3, pero: 2
BraEF1G3	Bra030790	A08:19586542-19589988	8	1701	566	64.2357	5.73	80.97	-0.326	cyto: 4, E.R.: 4, nucl: 3, chlo: 1, mito: 1
BraTCHQD1	Bra015679	A07:24677795-24680342	4	1029	342	39.7785	8.73	87.78	-0.427	chlo: 6, cyto: 3, mito: 2, nucl: 1, extr: 1

## Sheet: Table 3
Table. 3	Identification of BraGST syntenic genes between A. thaliana along with three subgenomes of Brassica rapa
Family	A.thaliana		B.rapa
		Synteny Ortholog			Non-Synteny Ortholog
		LF	MF1	MF2
Phi	AT1G02920	BraGSTF16…	BraGSTF1	BraGSTF8
		BraGSTF2…
		BraGSTF13…
		BraGSTF22…
	AT4G02520	BraGSTF4…	BraGSTF7…	BraGSTF3
		BraGSTF5…	BraGSTF6…
	AT2G47730	BraGSTF10		BraGSTF9
	-				BraGSTF11
	AT3G62760				BraGSTF12
	-				BraGSTF14
	AT5G17220	BraGSTF17		BraGSTF15
	AT2G30860		BraGSTF18	BraGSTF19…
				BraGSTF20…
	AT3G03190				BraGSTF21
Tau	AT2G29420		BraGSTU6…	BraGSTU1
			BraGSTU3…
			BraGSTU4…
			BraGSTU5…
	AT2G29460				BraGSTU2…
					BraGSTU8…
	AT3G09270				BraGSTU7
	AT1G59700				BraGSTU9…
	AT1G74590	BraGSTU24	BraGSTU10
	AT1G17170	BraGSTU11…	BraGSTU15	BraGSTU17
		BraGSTU23…
		BraGSTU31…
	-				BraGSTU12…
					BraGSTU14…
					BraGSTU18…
	AT1G78360		Bra008357	BraGSTU13…
				BraGSTU20…
				BraGSTU21…
				BraGSTU34…
	AT1G27130	BraGSTU16		Bra012422
	AT5G62480				BraGSTU19
	AT1G10360	BraGSTU25		BraGSTU37
	AT1G78320				BraGSTU26…
					BraGSTU32…
	AT1G69920	BraGSTU27…	BraGSTU33…	BraGSTU36
		BraGSTU28…	BraGSTU30…
		BraGSTU29…
	AT1G53680				BraGSTU35
Zeta	AT2G03820	BraGSTZ1	BraGSTZ3	BraGSTZ2
Theta	AT5G41210	BraGSTT1	BraGSTT2
Lambda	AT5G02780				BraGSTL1
	AT3G55040				BraGSTL2
	-				BraGSTL3
Dehydroascorbate reductase (DHAR)	AT5G16710				BraDHAR1
	AT1G19550	BraDHAR2	BraDHAR4
	AT1G75270				BraDHAR3
EF1G	AT1G09640	BraEF1G2	BraEF1G3	BraEF1G1
Tetrachlorohydroquinone dehalogenase (TCHQD)	AT1G77290				BraTCHQD1

## Sheet: Table 4
					Table. 4	The FPKM values of BraGST genes
				Gene ID	Root	Stem	Leaf	Flower	Silique
				BraGSTF1	6.89059	1.45163	1.14861	0.895903	29.4002
				BraGSTF2	16.2262	0.446654	0	0.447952	18.6518
				BraGSTF3	700.655	185.99	136.056	4.83204	51.4675
				BraGSTF4	2.6152	0.655278	1.12629	0.439277	2.17032
				BraGSTF5	22.6651	0.873704	0.225258	0	1.86027
				BraGSTF6	6.97386	9.50153	5.63145	0	2.79041
				BraGSTF7	57.5344	31.5626	39.4202	1.09819	23.5634
				BraGSTF8	32.0856	0.985142	1.50883	0	0.259991
				BraGSTF9	602.58	437.872	267.075	1306.89	194.078
				BraGSTF10	0	0	0	0	0
				BraGSTF11	1.1292	0	0.291307	0	0
				BraGSTF12	10.0673	2.09242	0	0.211449	2.08985
				BraGSTF13	0.177469	0	0	0	0.506356
				BraGSTF14	244.92	0.168029	0	2.95244	1.2273
				BraGSTF15	0.21513	2.04512	16.0111	2.38523	4.28563
				BraGSTF16	28.3363	2.69728	7.04296	3.69511	0.372139
				BraGSTF17	0	0	0	0.439277	33.4849
				BraGSTF18	3086.26	3724.17	534.817	185.397	55.7132
				BraGSTF19	1501.18	2091.73	278.194	203.178	192.547
				BraGSTF20	1420.72	651.318	258.847	24.2859	23.8771
				BraGSTF21	68.6837	12.1713	4.82418	4.03156	0.316132
				BraGSTF22	0	0	0	0	0
				BraGSTU1	75.2434	81.1666	366.508	587.339	146.828
				BraGSTU2	1.22016	7.7831	26.2843	394.362	8.10884
				BraGSTU3	0	0	0	0	0.879347
				BraGSTU4	15.252	2.22374	43.3165	2.87107	5.21283
				BraGSTU5	0.992666	1.47621	18.683	0	0
				BraGSTU6	40.2242	12.8511	31.3516	1.63078	1.43938
				BraGSTU7	3.01377	0.398915	26.8012	0	0
				BraGSTU8	0	0	0	0	0
				BraGSTU9	17.0619	73.5582	267.088	790.888	1271.86
				BraGSTU10	8.5329	0.767085	14.8423	35.8026	0
				BraGSTU11	100.896	5.38191	67.825	0.216839	15.3058
				BraGSTU12	30.2019	60.0524	15.8286	1.26869	0.895649
				BraGSTU13	197.361	105.249	322.86	261.35	369.007
				BraGSTU14	0.838941	0.104621	3.25245	0.211449	0.895649
				BraGSTU15	44.6736	6.4865	14.094	223.924	16.4202
				BraGSTU16	600.953	441.443	161.298	23.3663	73.6818
				BraGSTU17	0	0.209242	0.21683	0	4.1797
				BraGSTU18	14.6815	86.94	6.72174	5.28621	0
				BraGSTU19	0	0	0	0	2.45901
				BraGSTU20	12.0303	0.316078	0	0.425542	9.9134
				BraGSTU21	14.59	0.311679	0	0.630428	0
				BraGSTU22	75.4935	7.72723	14.87	11.8846	10.8105
				BraGSTU23	207.848	66.3297	74.5896	4.44042	8.65794
				BraGSTU24	3.49073	4.50662	1.404	4.49978	1.93445
				BraGSTU25	7.38958	15.2563	104.296	36.8624	1747.03
				BraGSTU26	170.703	2.18175	3.01681	3.57243	15.1325
				BraGSTU27	27.5961	13.2859	28.1272	0.200249	1.69692
				BraGSTU28	13.3419	7.38213	22.5232	0.989594	1.11819
				BraGSTU29	1.72536	4.54414	72.9684	3.86837	1.09289
				BraGSTU30	1.96204	0.194267	1.42038	0	0
				BraGSTU31	21.2597	2.909	3.44779	1.68114	0.296716
				BraGSTU32	0	0	0	0	0
				BraGSTU33	0.675812	0	0	0	0
				BraGSTU34	594.046	288.534	322.687	444.219	390.254
				BraGSTU35	1.83024	0	0	0	0
				BraGSTU36	1.53366	5.49083	14.0781	0	0.273224
				BraGSTU37	0.599155	4.25988	5.57624	30.618	19.914
				BraGSTZ1	52.086	27.4125	22.3006	77.9716	52.7077
				BraGSTZ2	12.1817	18.7425	18.8046	101.178	37.4051
				BraGSTZ3	0.389558	0.0913945	0	0	0
				BraGSTT1	18.296	29.3837	48.8087	70.254	60.8946
				BraGSTT2	27.4627	42.6942	54.9138	89.8459	67.2817
				BraGSTL1	8.08212	12.0304	36.2962	69.0777	80.5159
				BraGSTL2	14.2865	25.4145	58.1574	40.4729	26.0958
				BraGSTL3	9.33554	2.96286	5.77578	4.37365	3.51927
				BraDHAR1	0	0	0	0	0
				BraDHAR2	132.503	369.468	720.826	712.946	311.596
				BraDHAR3	0.866091	0.21684	0.223808	3.92813	6.16137
				BraDHAR4	68.6837	116.688	53.2957	151.632	400.539
				BraEF1G1	215.104	172.837	154.057	150.609	398.639
				BraEF1G2	268.194	298.497	319.3	98.2648	234.621
				BraEF1G3	73.9079	73.1067	69.563	37.983	77.0987
				BraTCHQD1	14.0918	11.0692	7.36269	5.63259	9.66846

## Sheet: Table 5
			Table. 5	Syntenic paralog pairs of BraGSTs with PC and FPKM values
			Gene_ID	Root	Stem	Leaf	Flower	Silique
			BraGSTF16_BraGSTF2 (0.391434)	44.5625	3.14393	7.04296	4.14306	19.0239
			BraGSTF13_BraGSTF22 (NA)	0.177469	0	0	0	0.506356
			BraGSTF4_BraGSTF5 (0.754303)	25.2803	1.52898	1.35155	0.439277	4.03059
			BraGSTF6_BraGSTF7 (0.738118)	64.5083	41.0641	45.0517	1.09819	26.3538
			BraGSTF19_BraGSTF20 (0.742818)	2921.9	2743.05	537.041	227.464	216.424
			BraGSTU6_BraGSTU3 (-0.50998)	40.2242	12.8511	31.3516	1.63078	2.31873
			BraGSTU4_BraGSTU5 (0.954966)	16.2447	3.69995	61.9995	2.87107	5.21283
			BraGSTU2_BraGSTU8 (NA)	1.22016	7.7831	26.2843	394.362	8.10884
			BraGSTU11_BraGSTU23 (0.877752)	308.744	71.7116	142.415	4.65726	23.9637
			BraGSTU12_BraGSTU14 (-0.24359)	31.0408	60.157	19.0811	1.48014	1.7913
			BraGSTU13_BraGSTU20 (0.194318)	209.391	105.565	322.86	261.776	378.92
			BraGSTU21_BraSTU34 (0.874333)	608.636	288.846	322.687	444.849	390.254
			BraGSTU26_BraGSTU32 (NA)	170.703	2.18175	3.01681	3.57243	15.1325
			BraGSTU27_BraGSTU28 (0.935861)	40.938	20.668	50.6504	1.18984	2.81511
			BraGSTU30_BraGSTU33 (0.761968)	2.63785	0.194267	1.42038	0	0

## Sheet: Table 6
	Table. 6	Cis-Elements of BraGST genes in Brassica rapa
Hormones	Cis-Elements	Function	BraGSTF1	BraGSTF2	BraGSTF3	BraGSTF4	BraGSTF5	BraGSTF6	BraGSTF7	BraGSTF8	BraGSTF9	BraGSTF10	BraGSTF11	BraGSTF12	BraGSTF13	BraGSTF14	BraGSTF15	BraGSTF16	BraGSTF17	BraGSTF18	BraGSTF19	BraGSTF20	BraGSTF21	BraGSTF22	BraGSTU1	BraGSTU2	BraGSTU3	BraGSTU4	BraGSTU5	BraGSTU6	BraGSTU7	BraGSTU8	BraGSTU9	BraGSTU10	BraGSTU11	BraGSTU12	BraGSTU13	BraGSTU14	BraGSTU15	BraGSTU16	BraGSTU17	BraGSTU18	BraGSTU19	BraGSTU20	BraGSTU21	BraGSTU23	BraGSTU24	BraGSTU25	BraGSTU26
	CGTCA-motif	cis-acting regulatory element involved in the MeJA-responsiveness		√			√		√	√	√	√		√	√	√	√					√		√		√	√	√		√	√	√			√	√	√	√	√	√		√		√	√	√	√	√
	TGACG-motif	cis-acting regulatory element involved in the MeJA-responsiveness		√			√		√	√	√	√		√	√	√	√					√		√		√	√	√		√	√	√			√	√	√	√	√	√		√		√	√	√	√	√
	ERE-motif	ethylene-responsive element						√				√	√	√				√		√							√		√												√	√
	GARE-motif	gibberellin-responsive element	√	√	√	√	√	√	√		√			√			√		√		√	√		√		√		√	√	√		√		√			√	√					√		√	√		√	√
	P-BOX	gibberellin-responsive element			√								√						√			√											√	√				√							√	√
	TCA-Element	cis-acting element involved in salicylic acid responsiveness		√			√		√		√				√		√	√		√		√	√			√	√					√		√						√			√	√	√	√		√	√
	TGA-Element	auxin-responsive element		√	√							√		√								√	√	√	√				√		√	√	√					√		√						√			√
	ABRE	cis-acting element involved in the abscisic acid responsiveness	√	√		√					√	√		√	√	√		√		√	√			√	√		√	√		√	√				√			√		√		√	√	√	√	√	√	√	√
	AuxRR-Core	cis-acting regulatory element involved in auxin responsiveness											√			√																													√
	TATC-Box	cis-acting element involved in gibberellin-responsiveness								√							√
	SARE	cis-acting element involved in salicylic acid responsiveness
	CE3	cis-acting element involved in ABA and VP1 responsiveness										√																√					√
	TGA-Box	part of an auxin-responsive element																																			√							√				√
[truncated: 27 more columns]

## Sheet: Table 7
	Table. 7	Relative Expression pattern of BraGST genes along with PC values with respect to hormonal stresses by qRT-PCR
Gene	ABA-1	ABA-6	ABA-12	Pearson Correlation		Gene	GA-1	GA-6	GA-12	Pearson Correlation		Gene	BR-1	BR-6	BR-12	Pearson Correlation		Gene	ETH-1	ETH-6	ETH-12	Pearson Correlation		Gene	IAA-1	IAA-6	IAA-12	Pearson Correlation		Gene	IBA-1	IBA-6	IBA-12	Pearson Correlation		Gene	NPA-1	NPA-6	NPA-12	Pearson Correlation		Gene	JA-1	JA-6	JA-12	Pearson Correlation
BraGSTF16	4.88148	1.27605	60.8071			BraGSTF16	0.797109	4.01372	2.51939			BraGSTF16	9.46306	2.33732	1.98245			BraGSTF16	0.0429803	1.22614	1.5332			BraGSTF16	0.645333	1.57434	0.404737			BraGSTF16	235.358	3.11537	0.0795692			BraGSTF16	11.6569	0.217935	7.431			BraGSTF16	0.473388	0.0784636	57.8449
BraGSTF2	1.98876	5.17367	1.23899	-0.687509		BraGSTF2	1.04934	0.513806	0.825039	-0.990989		BraGSTF2	2.54131	2.49515	8.10071	-0.52991		BraGSTF2	0.1135	6.35217	1.43982	0.505872		BraGSTF2	0.254693	30.9658	1.60878	0.972503		BraGSTF2	5.9377	0.594425	3.1982	0.86773		BraGSTF2	0.828988	3.89629	1.2401	-0.968867		BraGSTF2	0.82041	0.509173	4.1114	0.997402
BraGSTF13	0.639165	1.31832	0.630641			BraGSTF13	1.04269	2.08952	1.31098			BraGSTF13	0.157725	0.0595853	65.2001			BraGSTF13	3.21645	10.2371	1.63289			BraGSTF13	0.0950457	0.13068	0.510594			BraGSTF13	1.59965	0.244533	0.63361			BraGSTF13	0.630031	0.776266	1.99598			BraGSTF13	0.146337	0.412812	0.0639052
BraGSTF22	2.1189	35.4678	0.854365	0.999771		BraGSTF22	0.471838	2.13537	0.870215	0.99984		BraGSTF22	1.80587	1.02791	1.40704	-0.0133191		BraGSTF22	0.167139	0.936873	3.29587	-0.443089		BraGSTF22	6.96351	1.105	4.49381	0.0128953		BraGSTF22	14.0389	4.92028	0.668592	0.825891		BraGSTF22	1171.35	5.18901	47.1989	-0.555934		BraGSTF22	2.65717	3.63732	25.2971	-0.654313
BraGSTF4	5.05246	4.11985	0.982621			BraGSTF4	1.02872	0.127517	1.31868			BraGSTF4	1.04752	0.499284	1.63467			BraGSTF4	0.183058	0.126049	1.0529			BraGSTF4	1.64436	0.853356	0.32559			BraGSTF4	4.24267	0.506652	1.05949			BraGSTF4	5.25614	0.786874	2.63288			BraGSTF4	1.39129	0.330843	0.127664
BraGSTF5	0.153156	3.28893	0.786366	0.110765		BraGSTF5	0.080981	0.244583	0.512715	0.365768		BraGSTF5	0.122058	2.23367	0.313604	-0.810678		BraGSTF5	0.0499463	0.198176	0.247416	0.652268		BraGSTF5	0.507441	0.0765039	0.511915	0.105595		BraGSTF5	1.58539	0.180616	0.0987635	0.982657		BraGSTF5	0.385307	0.982649	0.499274	-0.903466		BraGSTF5	0.642391	0.260177	0.062883	0.98179
BraGSTF6	19.012	0.0889487	1.75342			BraGSTF6	0.0914217	0.439238	0.566931			BraGSTF6	5.70699	0.438396	0.718431			BraGSTF6	0.0636249	0.213877	1.12011			BraGSTF6	1.44247	2.88344	0.692179			BraGSTF6	42.0621	11.2076	0.442673			BraGSTF6	23.6082	2.22257	2.18567			BraGSTF6	160.773	27.697	0.59951
BraGSTF7	51.0923	0.802737	12.371	0.989949		BraGSTF7	0.324187	2.02814	4.08615	0.950657		BraGSTF7	10.4492	9.98681	0.11948	0.493387		BraGSTF7	0.237732	0.192369	0.977587	0.983248		BraGSTF7	0.668534	1.06861	0.99934	0.336052		BraGSTF7	1.30967	3.91245	0.197176	0.0242274		BraGSTF7	1.66731	3.28506	11.1043	-0.633496		BraGSTF7	0.483626	0.0773116	4.52321	-0.564275
BraGSTF19	3.94072	0.332687	6.39397			BraGSTF19	2.52845	0.198531	2.60759			BraGSTF19	1.5804	0.046254	2.02523			BraGSTF19	0.152921	0.161973	1.27213			BraGSTF19	0.0312774	0.83809	0.0321968			BraGSTF19	0.196672	0.0188945	0.0994267			BraGSTF19	1.30301	0.153894	0.00923315			BraGSTF19	0.0202301	0.048967	0.00566354
BraGSTF20	85.4789	26.8481	168.102	0.978589		BraGSTF20	17.4178	1.28491	21.704	0.985336		BraGSTF20	21.3824	3.12714	13.9546	0.806622		BraGSTF20	0.253244	4.24979	52.1779	0.998067		BraGSTF20	2.48081	11.3529	27.0902	-0.158038		BraGSTF20	33.2359	2.01605	1.70261	0.887905		BraGSTF20	2.53192	20.2931	127.065	-0.687493		BraGSTF20	576.583	34.2283	0.678765	-0.134402
BraGSTU6	1.97128	0.126961	0.625487			BraGSTU6	0.816757	0.0495257	1.28231			BraGSTU6	1.27804	0.157195	4.10819			BraGSTU6	0.0623051	0.250043	2.43568			BraGSTU6	0.19676	0.0201129	1.58372			BraGSTU6	0.995964	1.23667	0.500236			BraGSTU6	0.494158	1.93307	2.99351			BraGSTU6	0.0987224	0.0790515	0.0629307
BraGSTU3	0.244759	0.40069	0.315059	-0.950497		BraGSTU3	0.12479	0.0246522	0.39265	0.921969		BraGSTU3	0.154006	0.0381264	4.0857	0.967995		BraGSTU3	0.039428	1.00158	0.332962	-0.149616		BraGSTU3	0.0996999	0.485795	1.5981	0.937964		BraGSTU3	3.97645	0.107545	0.203912	0.174589		BraGSTU3	0.65481	0.970808	0.299149	-0.453307		BraGSTU3	0.0450295	0.395673	0.0247108	-0.00847292
BraGSTU4	6.38124	4.18168	0.0483124			BraGSTU4	1.29844	2.28564	0.795147			BraGSTU4	2.77868	0.0301579	10.3735			BraGSTU4	0.0827137	6.50954	0.414615			BraGSTU4	0.498589	2.65769	2.55494			BraGSTU4	64.8218	3.18437	5.1762			BraGSTU4	8.20781	1.94987	0.191672			BraGSTU4	0.505791	0.833624	0.327072
BraGSTU5	3.18119	1.2857	0.186956	0.947028		BraGSTU5	1.04636	98.1443	1.01027	0.943424		BraGSTU5	2.51928	0.180716	2.36563	0.662569		BraGSTU5	0.0395541	0.148981	0.334993	-0.102501		BraGSTU5	0.801849	0.305074	0.801888	-0.536026		BraGSTU5	30.4745	4.00364	1.66415	0.994842		BraGSTU5	0.942613	1.28367	1.4595	-0.991444		BraGSTU5	25.0024	0.424725	0.65761	-0.175675
BraGSTU2	0.187673	0.642455	0.0150079			BraGSTU2	0.631993	1.26256	0.783322			BraGSTU2	0.062396	0.00385709	0.994341			BraGSTU2	0.0305606	0.402083	0.381959			BraGSTU2	0.0615091	0.051555	0.501485			BraGSTU2	0.0784574	0.0186941	0.102081			BraGSTU2	0.152498	0.384067	15.9913			BraGSTU2	0.0149521	0.0200212	0.0122122
BraGSTU8	2.72128	2.58749	0.0276162	0.681004		BraGSTU8	0.0798782	0.0327212	0.197572	-0.542226		BraGSTU8	0.15786	0.0598814	8.19005	0.99911		BraGSTU8	2.53935	1.99452	3.09673	-0.0415926		BraGSTU8	1.0007	0.100048	2.00713	0.890563		BraGSTU8	8.07175	0.784261	0.319419	0.190537		BraGSTU8	6.1751	4.80385	15.2073	0.990988		BraGSTU8	0.244087	0.988891	0.300454	0.912648
BraGSTU11	1.22632	2.00814	0.0565218			BraGSTU11	0.20142	40.9143	0.125348			BraGSTU11	0.48572	2.10003	4.05693			BraGSTU11	0.0795335	1.60784	0.281871			BraGSTU11	0.996573	0.111711	2.48822			BraGSTU11	250.064	1.67468	0.0498222			BraGSTU11	0.479263	0.486105	0.600461			BraGSTU11	2.97784	0.996564	0.0775045
BraGSTU23	1.24589	2.58358	3.17446	-0.405862		BraGSTU23	1.68319	0.990591	1.62513	-0.997018		BraGSTU23	0.389155	0.0261363	6.50882	0.868751		BraGSTU23	5.18354	1.60639	1.93281	-0.665667		BraGSTU23	2.53371	6.59998	3.20529	-0.678837		BraGSTU23	8.00246	6.25272	3.20524	0.782027		BraGSTU23	20.8441	3.87378	5.01294	-0.491477		BraGSTU23	1.9778	0.817977	4.06906	-0.461023
BraGSTU12	0.847507	2.60116	0.440371			BraGSTU12	0.508418	0.302627	3.25042			BraGSTU12	1.26998	0.118665	8.12389			BraGSTU12	0.626609	2.57796	4.9627			BraGSTU12	4.02805	0.143034	2.01572			BraGSTU12	3.17306	1.2405	0.498908			BraGSTU12	5.09649	3.91663	1.99286			BraGSTU12	5.86314	0.0636754	0.316994
BraGSTU14	2006.47	5.48769	0.781451	-0.336623		BraGSTU14	4.51271	64.0054	1.31162	-0.590363		BraGSTU14	16.8547	0.635598	67.9753	0.99506		BraGSTU14	42.8078	8.6672	2.90075	-0.901676		BraGSTU14	1.01959	1.66815	1.54393	-0.948785		BraGSTU14	4.35683	2.6369	0.875046	0.966742		BraGSTU14	8.05093	10.6511	6.52943	0.489179		BraGSTU14	123.086	0.510893	0.964857	0.999372
BraGSTU13	0.11936	8.23601	1.55045			BraGSTU13	1.61916	0.0632267	0.790414			BraGSTU13	0.0125439	0.182713	3.22296			BraGSTU13	0.813362	6.38508	0.323594			BraGSTU13	0.157669	0.258078	0.63862			BraGSTU13	0.0304157	0.122144	0.0394684			BraGSTU13	0.466141	15.3822	0.316971			BraGSTU13	0.00490398	0.0316689	0.00119356
BraGSTU20	19.2235	2.06254	0.220069	-0.56588		BraGSTU20	1.28299	0.316306	1.02519	0.955091		BraGSTU20	0.799072	0.216982	3.26289	0.974097		BraGSTU20	1.64781	1.63313	1.24145	0.53504		BraGSTU20	1.58068	0.240616	5.18211	0.894052		BraGSTU20	3.20461	0.76377	0.154443	-0.410841		BraGSTU20	0.742903	3.07823	1.55985	0.935715		BraGSTU20	58.8088	0.101117	0.0937144	-0.400152
BraGSTU21	9.21998	6.40519	0.161259			BraGSTU21	1.64669	1.04718	6.68356			BraGSTU21	32.0286	6.52377	1.259			BraGSTU21	5.07853	1.00499	0.942392			BraGSTU21	6.04623	3.43267	2.59177			BraGSTU21	12.99	0.716051	0.304945			BraGSTU21	166.487	1.21237	1.53164			BraGSTU21	1.6903	0.531459	0.107963
BraGSTU34	2.14042	52.9035	0.634537	0.238168		BraGSTU34	28.5599	3.38419	56.6635	0.923036		BraGSTU34	6.3592	176.287	26.913	-0.456439		BraGSTU34	13.586	13.8178	43.918	-0.51709		BraGSTU34	5.44302	57.2643	13.765	-0.424228		BraGSTU34	13.6501	13.3057	3.47729	0.54964		BraGSTU34	27.2541	8.24987	6.66049	0.997475		BraGSTU34	12.9274	7.0585	0.556733	0.957767
BraGSTU26	4.04885	10.3011	0.00908234			BraGSTU26	0.810379	0.126248	0.163322			BraGSTU26	51.8527	0.00854462	3.27478			BraGSTU26	6.55772	2.56309	0.620201			BraGSTU26	3.99086	1.05398	1.02861			BraGSTU26	32.2002	1.56897	0.201158			BraGSTU26	0.0980719	9.7781	4.01804			BraGSTU26	0.50578	1.03375	0.0532027
BraGSTU32	0.0461814	0.0414177	1.36582	-0.799725		BraGSTU32	0.0610949	0.532509	0.0528914	-0.528523		BraGSTU32	7.1895	2.13969	0.680092	0.963345		BraGSTU32	0.132011	0.26975	0.130001	-0.183336		BraGSTU32	0.206786	0.0247782	0.52892	-0.165798		BraGSTU32	0.205426	0.0456791	0.0328171	0.999576		BraGSTU32	0.260437	0.811416	0.131298	0.828701		BraGSTU32	0.0224297	0.16834	0.00864083	0.920575
BraGSTU27	0.106518	1.79589	0.078527			BraGSTU27	0.6444	0.506807	1.29077			BraGSTU27	1.01061	0.239423	8.10637			BraGSTU27	41.0395	65.4092	6.28141			BraGSTU27	50.7187	2.61249	40.8763			BraGSTU27	25.5525	1.9722	0.398247			BraGSTU27	6458.37	1.94853	40.2545			BraGSTU27	0.485574	0.20199	0.0191359
BraGSTU28	2.51655	1.01701	0.0499552	-0.10955		BraGSTU28	1.0575	1.29598	0.103571	-0.999687		BraGSTU28	1.0224	0.116639	3.24758	0.980873		BraGSTU28	0.830851	0.201965	0.387969	-0.189752		BraGSTU28	0.810571	2.64694	0.0667486	-0.887592		BraGSTU28	0.200267	1.00881	0.24999	-0.499144		BraGSTU28	16.459	0.0632138	0.978551	0.999008		BraGSTU28	3.22955	0.257954	0.327224	0.913097
BraGSTU30	3.32596	1.65983	0.0582761			BraGSTU30	1.33263	0.127099	0.257132			BraGSTU30	0.647972	0.0544494	25.8301			BraGSTU30	6.57549	6.49791	2.52521			BraGSTU30	1.59942	0.860914	0.642247			BraGSTU30	5.18305	0.184478	0.466526			BraGSTU30	1.31226	3.1317	3.17074			BraGSTU30	0.650161	0.212298	0.688884
BraGSTU33	2.53651	32.2612	0.0361167	0.0583515		BraGSTU33	1.00038	1.29995	0.403323	0.090715		BraGSTU33	0.243319	0.604654	8.03053	0.998123		BraGSTU33	3.2021	2.01637	3.90724	-0.773758		BraGSTU33	3.15105	0.830522	4.03146	0.0343792		BraGSTU33	0.492754	0.114805	0.494343	0.539807		BraGSTU33	0.794639	4.87955	5.0095	0.999962		BraGSTU33	0.306853	0.318944	0.157322	-0.616284

## Sheet: Table 8
				Table. 8	Pearson correlation coefficient of the stress-induced BraGSTs whose PC is greater than 0.5
				Hormones Responsible	Gene 1	Gene 2	Correlation Coefficient
				ABA	BraGSTF13	BraGSTF22	0.999771
					BraGSTF6	BraGSTF7	0.989949
					BraGSTF19	BraGSTF20	0.978589
					BraGSTU4	BraGSTU5	0.947028
					BraGSTU2	BraGSTU8	0.681004
				GA	BraGSTF13	BraGSTF22	0.99984
					BraGSTF6	BraGSTF7	0.950657
					BraGSTF19	BraGSTF20	0.985336
					BraGSTU6	BraGSTU3	0.921969
					BraGSTU4	BraGSTU5	0.943424
					BraGSTU13	BraGSTU20	0.955091
					BraGSTU21	BraGSTU34	0.923036
				BR	BraGSTF19	BraGSTF20	0.806622
					BraGSTU6	BraGSTU3	0.967995
					BraGSTU4	BraGSTU5	0.662569
					BraGSTU2	BraGSTU8	0.99911
					BraGSTU11	BraGSTU23	0.868751
					BraGSTU12	BraGSTU14	0.99506
					BraGSTU13	BraGSTU20	0.974097
					BraGSTU26	BraGSTU32	0.963345
					BraGSTU27	BraGSTU28	0.980873
					BraGSTU30	BraGSTU33	0.998123
				ETH	BraGSTF16	BraGSTF2	0.505872
					BraGSTF4	BraGSTF5	0.652268
					BraGSTF6	BraGSTF7	0.983248
					BraGSTF19	BraGSTF20	0.998067
					BraGSTU20	BraGSTU21	0.53504
				IAA	BraGSTF16	BraGSTF2	0.972503
					BraGSTU6	BraGSTU3	0.937964
					BraGSTU2	BraGSTU8	0.890563
					BraGSTU13	BraGSTU20	0.894052
				IBA	BraGSTF16	BraGSTF2	0.86773
					BraGSTF13	BraGSTF22	0.825891
					BraGSTF4	BraGSTF5	0.982657
					BraGSTF19	BraGSTF20	0.887905
					BraGSTU4	BraGSTU5	0.994842
					BraGSTU11	BraGSTU23	0.782027
					BraGSTU12	BraGSTU14	0.966742
					BraGSTU21	BraGSTU34	0.54964
					BraGSTU26	BraGSTU32	0.999576
					BraGSTU30	BraGSTU33	0.539807
				NPA	BraGSTU2	BraGSTU8	0.990988
					BraGSTU13	BraGSTU20	0.935715
					BraGSTU21	BraGSTU34	0.997475
					BraGSTU26	BraGSTU32	0.828701
					BraGSTU27	BraGSTU28	0.999008
					BraGSTU30	BraGSTU33	0.999962
				JA	BraGSTF16	BraGSTF2	0.997402
					BraGSTF4	BraGSTF5	0.98179
					BraGSTU2	BraGSTU8	0.912648
					BraGSTU12	BraGSTU14	0.999372
					BraGSTU21	BraGSTU34	0.957767
					BraGSTU26	BraGSTU32	0.920575
					BraGSTU27	BraGSTU28	0.913097
