# Supplementary figures and images for: Genome-Wide Identification, Classification, and Expression Divergence of Glutathione-Transferase Family in Brassica rapa under Multiple Hormone Treatments
Source: Hindawi journal article supplement (doi:10.1155/2018/6023457), 2018-01-01

**Tau**  
**Lambda**  
**EF1G**  
**Zeta**  
**Theta**  
**TCHQD**  
**Phi**

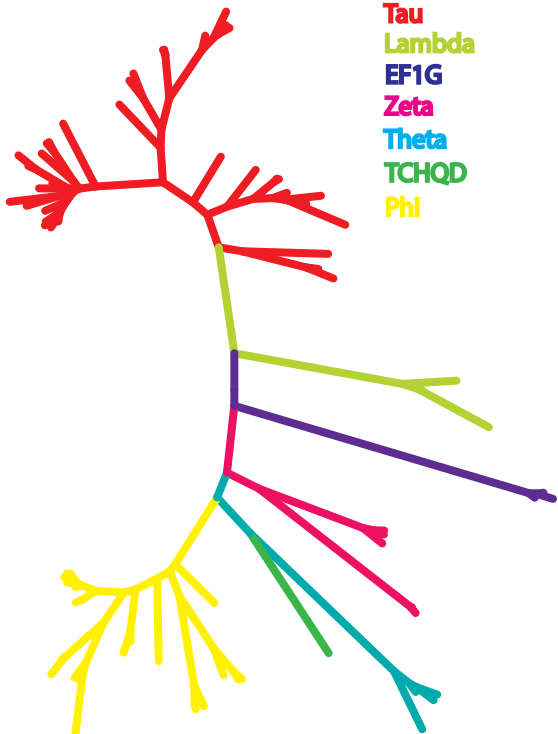

0.2

Supplement: f1 [file 6023457.f1.zip]
